# Supplementary material for: High Dietary Glycemic Load is Associated with Poor Functional Outcome in Patients with Acute Cerebral Infarction
Source: PubMed Central journal article supplement — J Clin Neurol. 2018 Jan 10;14(2):165–73. doi: 10.3988/jcn.2018.14.2.165 (PMC5897198; doi:10.3988/jcn.2018.14.2.165), 2018-01-10
Supplement: jcn-14-165-s001.pdf [file jcn-14-165-s001.pdf]

**Supplementary Table 1.** Comparison of demographic and clinical data according to functional outcomes dichotomized into poor and good (scores on the mRS of  $\geq 3$  and  $< 3$ , respectively)

| Variables                                         | mRS score $< 3$ (n=223) | mRS score $\geq 3$ (n=40) | p     |
|---------------------------------------------------|-------------------------|---------------------------|-------|
| <b>Demographic data</b>                           |                         |                           |       |
| Sex, male                                         | 130 (58.3)              | 23 (57.5)                 | 0.925 |
| Age, years                                        | 64.6 $\pm$ 11.9         | 70.1 $\pm$ 9.2            | 0.002 |
| Marital status, married                           | 151 (67.7)              | 21 (52.5)                 | 0.063 |
| Education, >7 years                               | 45 (20.2)               | 4 (10.0)                  | 0.128 |
| Prestroke mRS score                               | 0 [0–1]                 | 1 [0–1]                   | 0.019 |
| <b>Risk factors</b>                               |                         |                           |       |
| Hypertension                                      | 105 (47.1)              | 16 (40.0)                 | 0.408 |
| Diabetes mellitus                                 | 77 (34.5)               | 17 (42.5)                 | 0.333 |
| Hyperlipidemia                                    | 52 (23.3)               | 2 (5.0)                   | 0.008 |
| Alcohol intake                                    | 51 (22.9)               | 6 (15.0)                  | 0.266 |
| Smoking                                           | 92 (41.2)               | 11 (27.5)                 | 0.163 |
| Body mass index, kg/m <sup>2</sup>                | 23.0 $\pm$ 2.7          | 24.2 $\pm$ 3.3            | 0.032 |
| Regular exercise                                  | 139 (62.3)              | 29 (72.5)                 | 0.218 |
| <b>Laboratory findings</b>                        |                         |                           |       |
| White blood cell count, $\times 10^3/\mu\text{L}$ | 7.3 $\pm$ 2.9           | 7.9 $\pm$ 2.2             | 0.248 |
| Hemoglobin, mg/dL                                 | 13.3 $\pm$ 1.7          | 13.5 $\pm$ 1.6            | 0.622 |
| Fasting glucose, mg/dL                            | 119.4 $\pm$ 39.8        | 121.2 $\pm$ 38.8          | 0.801 |
| Triglycerides, mg/dL                              | 124.3 $\pm$ 63.9        | 125.8 $\pm$ 83.2          | 0.896 |
| Low-density lipoprotein, mg/dL                    | 116.5 $\pm$ 32.9        | 115.8 $\pm$ 29.1          | 0.888 |
| HbA1c, %                                          | 6.4 $\pm$ 1.4           | 6.8 $\pm$ 1.5             | 0.075 |
| Insulin, $\mu\text{IU/mL}$                        | 6.2 $\pm$ 4.8           | 7.2 $\pm$ 7.0             | 0.383 |
| C-reactive protein, mg/dL                         | 0.6 $\pm$ 1.7           | 1.1 $\pm$ 2.5             | 0.279 |
| <b>Stroke classification</b>                      |                         |                           | 0.003 |
| Large-artery atherosclerosis                      | 81 (36.3)               | 10 (25.0)                 |       |
| Lacune                                            | 81 (36.3)               | 8 (20.0)                  |       |
| Cardioembolism                                    | 31 (13.9)               | 14 (35.0)                 |       |
| Multiple causes                                   | 15 (6.7)                | 2 (5.0)                   |       |
| Negative evaluation                               | 15 (6.7)                | 6 (15.0)                  |       |
| NIHSS score                                       | 2 [1–4]                 | 8 [6–11]                  | 0.001 |
| Early neurological deterioration                  | 9 (4.0)                 | 11 (27.5)                 | 0.001 |
| High-grade WMHs                                   | 48 (21.5)               | 20 (50.0)                 | 0.001 |
| Symptomatic cerebral atherosclerosis              | 68 (30.5)               | 14 (35.0)                 | 0.571 |
| <b>SQFFQ data</b>                                 |                         |                           |       |
| GL                                                | 155.12 $\pm$ 65.7       | 181.2 $\pm$ 103.7         | 0.042 |
| GI                                                | 59.3 $\pm$ 4.8          | 61.0 $\pm$ 4.9            | 0.067 |
| Total carbohydrates, g/day                        | 261.7 $\pm$ 110.1       | 292.7 $\pm$ 121.4         | 0.041 |
| Total energy, kcal                                | 1,931.6 $\pm$ 788.8     | 2,139.8 $\pm$ 1,057.7     | 0.252 |
| Fat, g/day                                        | 53.8 $\pm$ 30.6         | 60.5 $\pm$ 37.7           | 0.286 |
| Protein, g/day                                    | 78.7 $\pm$ 35.3         | 85.0 $\pm$ 43.4           | 0.333 |
| Dietary fiber, g/day                              | 25.9 $\pm$ 12.6         | 26.6 $\pm$ 15.0           | 0.763 |
| Grains, g/day                                     | 334.7 $\pm$ 367.3       | 406.3 $\pm$ 331.6         | 0.261 |
| Starch, g/day                                     | 58.6 $\pm$ 104.1        | 39.4 $\pm$ 48.8           | 0.265 |
| Sugar, g/day                                      | 33.4 $\pm$ 43.2         | 38.8 $\pm$ 46.3           | 0.481 |

Data are median [interquartile range], n(%), or mean $\pm$ standard-deviation values.

GI: glycemic index, GL: glycemic load, HbA1c: hemoglobin A1c, mRS: modified Rankin Scale, NIHSS: National Institutes of Health Stroke Scale, SQFFQ: semiquantitative food-frequency questionnaire, WMHs: white-matter hyperintensities.
