# Supplementary material for: High Dietary Glycemic Load is Associated with Poor Functional Outcome in Patients with Acute Cerebral Infarction
Source: PubMed Central journal article supplement — J Clin Neurol. 2018 Jan 10;14(2):165–73. doi: 10.3988/jcn.2018.14.2.165 (PMC5897198; doi:10.3988/jcn.2018.14.2.165), 2018-01-10
Supplement: jcn-14-165-s002.pdf [file jcn-14-165-s002.pdf]

**Supplementary Table 2.** Results of multivariate analysis for poor functional outcome regarding dietary GL.

| Variables                        | OR (95% CI)         | p     |
|----------------------------------|---------------------|-------|
| Sex, male                        | 1.37 (0.36–5.17)    | 0.634 |
| Age                              | 1.06 (0.99–1.14)    | 0.080 |
| Marital status                   | 1.99 (0.27–14.34)   | 0.495 |
| Prestroke mRS score              | 23.63 (1.41–395.04) | 0.028 |
| Hyperlipidemia                   | 0.13 (0.10–1.96)    | 0.144 |
| Body mass index                  | 0.89 (0.71–1.12)    | 0.352 |
| Triglycerides                    | 1.01 (0.99–1.02)    | 0.426 |
| Low-density lipoprotein          | 1.01 (0.98–1.03)    | 0.469 |
| HbA1c                            | 1.24 (0.77–1.98)    | 0.368 |
| Stroke classification            |                     |       |
| Lacune                           | Reference           |       |
| Large-artery atherosclerosis     | 2.42 (0.65–90.12)   | 0.631 |
| Cardioembolism                   | 5.00 (0.13–187.57)  | 0.384 |
| Multiple causes                  | 8.10 (0.25–259.86)  | 0.237 |
| Negative evaluation              | 2.23 (0.56–88.76)   | 0.668 |
| NIHSS score                      | 2.02 (1.54–2.65)    | 0.001 |
| Early neurological deterioration | 4.65 (1.50–43.24)   | 0.007 |
| High-grade WMHs                  | 2.33 (0.63–8.59)    | 0.202 |
| GL                               | 1.01 (1.00–1.02)    | 0.003 |

CI: confidence interval, GL: glycemic load, HbA1c: hemoglobin A1c, mRS: modified Rankin Scale, NIHSS: National Institutes of Health Stroke Scale, OR: odds ratio, WMHs: white-matter hyperintensities.
