# Supplementary material for: High Dietary Glycemic Load is Associated with Poor Functional Outcome in Patients with Acute Cerebral Infarction
Source: PubMed Central journal article supplement — J Clin Neurol. 2018 Jan 10;14(2):165–73. doi: 10.3988/jcn.2018.14.2.165 (PMC5897198; doi:10.3988/jcn.2018.14.2.165), 2018-01-10
Supplement: jcn-14-165-s003.pdf [file jcn-14-165-s003.pdf]

**Supplementary Table 3.** Results of multivariate analysis for poor functional outcome regarding total carbohydrate intake

| Variables                        | OR (95% CI)         | p     |
|----------------------------------|---------------------|-------|
| Sex, male                        | 1.65 (0.44–6.10)    | 0.449 |
| Age                              | 1.08 (1.00–1.16)    | 0.040 |
| Marital status                   | 2.17 (0.31–14.87)   | 0.428 |
| Prestroke mRS score              | 12.06 (1.94–154.16) | 0.025 |
| Hyperlipidemia                   | 0.12 (0.10–1.97)    | 0.140 |
| Body mass index                  | 0.85 (0.68–1.07)    | 0.184 |
| Triglycerides                    | 1.00 (0.99–1.01)    | 0.579 |
| Low-density lipoprotein          | 1.01 (0.98–1.03)    | 0.432 |
| HbA1c                            | 1.29 (0.83–1.98)    | 0.248 |
| Stroke classification            |                     |       |
| Lacune                           | Reference           |       |
| Large-artery atherosclerosis     | 2.23 (0.65–34.00)   | 0.899 |
| Cardioembolism                   | 3.90 (0.13–109.47)  | 0.424 |
| Multiple causes                  | 4.49 (0.19–102.23)  | 0.345 |
| Negative evaluation              | 2.24 (0.41–38.03)   | 0.901 |
| NIHSS score                      | 1.98 (1.52–2.57)    | 0.001 |
| Early neurological deterioration | 5.25 (1.64–42.52)   | 0.012 |
| High-grade WMHs                  | 1.87 (0.51–6.92)    | 0.343 |
| Total carbohydrates              | 1.01 (1.00–1.02)    | 0.005 |

CI: confidence interval, HbA1c: hemoglobin A1c, mRS: modified Rankin Scale, NIHSS: National Institutes of Health Stroke Scale, OR: odds ratio, WMHs: white-matter hyperintensities.
